# Supplementary material for: Mapping climate change adaptive capacity and vulnerability of smallholder agricultural livelihoods in Central America: ranking and descriptive approaches to support adaptation strategies
Source: Springer Nature journal article supplement (doi:10.1007/s10584-016-1792-0), 2016-09-28
Supplement: 10584_2016_1792_MOESM2_ESM.pdf [file 10584_2016_1792_MOESM2_ESM.pdf]

Title: Mapping climate change adaptive capacity and vulnerability of smallholder agricultural livelihoods in Central America: ranking and descriptive approaches to support adaptation strategies

Journal: Climatic Change

Authors:

Claudia Bouroncle<sup>1\*</sup>, Pablo Imbach<sup>1</sup>, Beatriz Rodríguez-Sánchez<sup>2</sup>, Claudia Medellín<sup>1</sup>, Armando Martínez-Valle<sup>2</sup>, Peter Läderach<sup>2</sup>

Affiliations:

1. Climate Change Program, Tropical Agricultural Research and Higher Education Centre (CATIE), Turrialba, Costa Rica
2. Decision and Policy Analysis Research Area (DAPA), International Centre for Tropical Agriculture (CIAT), Cali, Colombia

\* Corresponding author e-mail: [cbouron@catie.ac.cr](mailto:cbouron@catie.ac.cr)

**Supplementary Material 2.** Most recent national statistics available for each country.

| Country     | Year | Population and housing censuses                                                                                                        |
|-------------|------|----------------------------------------------------------------------------------------------------------------------------------------|
| Guatemala   | 2002 | INE (Statistics National Institute of Guatemala) (2002) Censos Nacionales XI de Población y VI de Habitación 2002. INE, Guatemala City |
| El Salvador | 2007 | DIGESTYC (Department of Statistics and Censuses) (2007) VI Censo de Población y V de Vivienda. Ministry of Economy, San Salvador       |
| Honduras    | 2001 | INE (Statistics National Institute of Honduras) (2001) XVI Censo Nacional de Población y V de Habitación. INE, Tegucigalpa             |
| Nicaragua   | 2005 | INIDE (National Institute of Information for Development) (2005) VIII Censo Nacional de Población y IV de Vivienda. INIDE, Managua     |

| Country     | Year      | Agricultural census or agricultural statistics                                                                                                                                                              |
|-------------|-----------|-------------------------------------------------------------------------------------------------------------------------------------------------------------------------------------------------------------|
| Guatemala   | 2003      | INE (Statistics National Institute of Guatemala) (2004) IV Censo Nacional Agropecuario 2003. INE, Guatemala City                                                                                            |
| El Salvador | 2007-2008 | MINEC (Ministry of Economy, El Salvador), MAG (2009) IV Censo Agropecuario 2007/2008. MINEC, MAG, San Salvador                                                                                              |
| Honduras    | 1993      | SECPLAN (Secretary of Planning, Coordination and Budget) (1994) IV Censo Nacional Agropecuario. SECPLAN, Tegucigalpa                                                                                        |
| Nicaragua   | 2011      | INIDE, MAGFOR (Ministry of Agriculture and Forestry of Nicaragua) (2012) IV Censo Nacional Agropecuario: base de datos. <a href="http://www.inide.gob.ni/">http://www.inide.gob.ni/</a> Accessed 1 Mar 2013 |

| Country     | Year | Primary health care statistics                                                                                                                                                                                                                                                   |
|-------------|------|----------------------------------------------------------------------------------------------------------------------------------------------------------------------------------------------------------------------------------------------------------------------------------|
| Guatemala   | 2001 | FUNCEDE (Fundación Centroamericana de Desarrollo), Fundación Soros (2001) La salud en los distritos de Guatemala. FUNCEDE, Guatemala City                                                                                                                                        |
| El Salvador | 2008 | Ministry of Public Health, El Salvador (2008) Red de establecimientos de salud de primer nivel de atención. <a href="http://www.salud.gob.sv/temas/servicios-de-salud/sibasi/68.html">http://www.salud.gob.sv/temas/servicios-de-salud/sibasi/68.html</a> . Accessed 20 Mar 2013 |
| Honduras    | 2012 | Secretary of Health (Honduras) (2013) Funcionarios por centro de salud. <a href="http://www.salud.gob.hn/">http://www.salud.gob.hn/</a> Accessed 20 Mar 2013                                                                                                                     |
| Nicaragua   | 2012 | Ministry of Health, Nicaragua (2012) Red de Servicios de Sistemas Locales de Atención Integral en Salud. <a href="http://www.minsa.gob.ni/">http://www.minsa.gob.ni/</a> Accessed 20 Mar 2013                                                                                    |
