# Supplementary material for: Mapping climate change adaptive capacity and vulnerability of smallholder agricultural livelihoods in Central America: ranking and descriptive approaches to support adaptation strategies
Source: Springer Nature journal article supplement (doi:10.1007/s10584-016-1792-0), 2016-09-28
Supplement: 10584_2016_1792_MOESM5_ESM.pdf [file 10584_2016_1792_MOESM5_ESM.pdf]

Title: Mapping climate change adaptive capacity and vulnerability of smallholder agricultural livelihoods in Central America: ranking and descriptive approaches to support adaptation strategies

Journal: Climatic Change

Authors:

Claudia Bouroncle<sup>1\*</sup>, Pablo Imbach<sup>1</sup>, Beatriz Rodríguez-Sánchez<sup>2</sup>, Claudia Medellín<sup>1</sup>, Armando Martínez-Valle<sup>2</sup>, Peter Läderach<sup>2</sup>

Affiliations:

1. Climate Change Program, Tropical Agricultural Research and Higher Education Centre (CATIE), Turrialba, Costa Rica
2. Decision and Policy Analysis Research Area (DAPA), International Centre for Tropical Agriculture (CIAT), Cali, Colombia

\* Corresponding author e-mail: cbouron@catie.ac.cr

**Supplementary Material 5.** Regional and global organizations whose experts were surveyed to determine weights of different criteria of adaptive capacity.

|                                                                                                                                                                                                                                                                                                                                                                                                                                                                                                                                                                                                                   |
|-------------------------------------------------------------------------------------------------------------------------------------------------------------------------------------------------------------------------------------------------------------------------------------------------------------------------------------------------------------------------------------------------------------------------------------------------------------------------------------------------------------------------------------------------------------------------------------------------------------------|
| <p><b>Central American public sector agencies</b></p> <ul style="list-style-type: none"><li>• Ministry of Agriculture and Livestock, El Salvador</li><li>• Ministry of Agriculture and Livestock, Honduras</li><li>• Ministry of Agriculture, Livestock and Food, Guatemala</li><li>• Ministry of Environment and Natural Resources, El Salvador</li><li>• Ministry of Environment and Natural Resources, Guatemala</li><li>• Ministry of Natural Resources and Environment, Nicaragua</li><li>• National Directorate of Climate Change, Honduras</li><li>• Central American Agricultural Council (CAC)</li></ul> |
| <p><b>Central American universities</b></p> <ul style="list-style-type: none"><li>• EARTH University</li><li>• Panamerican Agricultural University (ZAMORANO)</li><li>• University for International Cooperation (UCI)</li></ul>                                                                                                                                                                                                                                                                                                                                                                                  |
| <p><b>Central American research and development organisations</b></p> <ul style="list-style-type: none"><li>• Inter-American Institute for Cooperation on Agriculture (IICA)</li><li>• Regional Research Program on Development and Environment (PRISMA)</li><li>• Regional Water Resources Committee (CRRH)</li><li>• Tropical Agricultural Research and Higher Education Center (CATIE)</li><li>• Water Center for the Humid Tropics of Latin America and the Caribbean (CATHALAC)</li></ul>                                                                                                                    |
| <p><b>Global agriculture and climate change research organisations</b></p> <ul style="list-style-type: none"><li>• Bioersity International</li><li>• CGIAR Research Program on Climate Change, Agriculture and Food Security - Latin America (CCAFS - LAM)</li><li>• International Center for Tropical Agriculture (CIAT)</li><li>• International Food Policy Research Institute (IFPRI)</li><li>• International Maize and Wheat Improvement Center (CIMMYT)</li><li>• International Potato Center (CIP)</li><li>• World Agroforestry Centre (ICRAF)</li></ul>                                                    |
| <p><b>Bilateral and multilateral agencies</b></p> <ul style="list-style-type: none"><li>• Inter-American Development Bank</li><li>• Economic Commission for Latin America and the Caribbean (ECLAC)</li><li>• Food and Agriculture Organization of the United Nations</li><li>• German Agency for International Cooperation (GIZ)</li><li>• United Nations Environment Programme (UNEP)</li><li>• United States Agency for International Development (USAID)</li></ul>                                                                                                                                            |
