# Supplementary material for: Mapping climate change adaptive capacity and vulnerability of smallholder agricultural livelihoods in Central America: ranking and descriptive approaches to support adaptation strategies
Source: Springer Nature journal article supplement (doi:10.1007/s10584-016-1792-0), 2016-09-28
Supplement: 10584_2016_1792_MOESM6_ESM.pdf [file 10584_2016_1792_MOESM6_ESM.pdf]

Title: Mapping climate change adaptive capacity and vulnerability of smallholder agricultural livelihoods in Central America: ranking and descriptive approaches to support adaptation strategies

Journal: Climatic Change

Authors:

Claudia Bouroncle<sup>1\*</sup>, Pablo Imbach<sup>1</sup>, Beatriz Rodríguez-Sánchez<sup>2</sup>, Claudia Medellín<sup>1</sup>, Armando Martínez-Valle<sup>2</sup>, Peter Läderach<sup>2</sup>

Affiliations:

1. Climate Change Program, Tropical Agricultural Research and Higher Education Centre (CATIE), Turrialba, Costa Rica
2. Decision and Policy Analysis Research Area (DAPA), International Centre for Tropical Agriculture (CIAT), Cali, Colombia

\* Corresponding author e-mail: [cbouron@catie.ac.cr](mailto:cbouron@catie.ac.cr)

**Supplementary Material 6.** Expected changes of climatic suitability for cash and subsistence crops in Guatemala, El Salvador, Honduras and Nicaragua projected for the 2020-2949 (2030) period and A1B emission scenario, based on EcoCrop model simulations. The baseline period was 1960-2000. Expected change is expressed in terms of the number and proportion of municipalities affected by different degrees of climatic suitability change for crop combinations (a), and average climatic suitability change of each crop by country (b).

|                                                       | Guatemala                                              | El Salvador  | Honduras     | Nicaragua    |
|-------------------------------------------------------|--------------------------------------------------------|--------------|--------------|--------------|
| Weighted Average Suitability Change proportion ranges | (a) Number (proportion) of municipalities by country   |              |              |              |
| -0.3 or less                                          |                                                        |              |              | 1 (<0.01)    |
| -0.3 – -0.2                                           |                                                        | 1 (<0.01)    | 2 (0.01)     | 7 (0.05)     |
| -0.2 – -0.1                                           | 9 (0.02)                                               | 56 (0.22)    | 18 (0.06)    | 33 (0.22)    |
| -0.1 – 0                                              | 79 (0.25)                                              | 132 (0.53)   | 104 (0.35)   | 72 (0.48)    |
| 0 – 0.1                                               | 86 (0.27)                                              | 62 (0.25)    | 150 (0.51)   | 37 (0.25)    |
| 0.1 – 0.2                                             | 111 (0.35)                                             |              | 20 (0.07)    | 1 (<0.01)    |
| 0.2 – 0.3                                             | 34 (0.11)                                              |              | 2 (0.01)     |              |
| 0.3 or more                                           | 2 (<0.01)                                              |              |              |              |
| Crops                                                 | Average climatic suitability change by country (total) |              |              |              |
| maize                                                 | 0.14                                                   | 0.10         | 0.11         | 0.12         |
| beans                                                 | -0.11                                                  | -0.29        | -0.23        | -0.29        |
| coffee                                                | -0.11                                                  | -0.22        | -0.18        | -0.18        |
| cassava                                               | 0.05                                                   | 0.01         | 0.05         | 0.04         |
| plantain                                              | -0.31                                                  | -0.28        | -0.23        | -0.32        |
| sorghum                                               | 0.03                                                   | 0.01         | 0.006        | 0.3          |
| upland rice                                           | 0.01                                                   | 0.08         | 0.03         | 0.02         |
| Average (SD)                                          | 0.08 (0.10)                                            | -0.05 (0.07) | 0.005 (0.07) | -0.06 (0.08) |
