# Supplementary material for: Mapping climate change adaptive capacity and vulnerability of smallholder agricultural livelihoods in Central America: ranking and descriptive approaches to support adaptation strategies
Source: Springer Nature journal article supplement (doi:10.1007/s10584-016-1792-0), 2016-09-28

Title: Mapping climate change adaptive capacity and vulnerability of smallholder agricultural livelihoods in Central America: ranking and descriptive approaches to support adaptation strategies

Journal: Climatic Change

Authors:

Claudia Bouroncle<sup>1\*</sup>, Pablo Imbach<sup>1</sup>, Beatriz Rodríguez-Sánchez<sup>2</sup>, Claudia Medellín<sup>1</sup>, Armando Martínez-Valle<sup>2</sup>, Peter Läderach<sup>2</sup>

Affiliations:

1. Climate Change Program, Tropical Agricultural Research and Higher Education Centre (CATIE), Turrialba, Costa Rica
2. Decision and Policy Analysis Research Area (DAPA), International Centre for Tropical Agriculture (CIAT), Cali, Colombia

\* Corresponding author e-mail: [cbouron@catie.ac.cr](mailto:cbouron@catie.ac.cr)

**Supplementary Material 7.** The proportion of agricultural land in municipalities of Guatemala, El Salvador, Honduras and Nicaragua occupied by coffee (a), beans (b), plantain (c), maize (d), cassava (e), upland rice (f), and sorghum (g) according to the most recent national agricultural censuses, and climatic suitability changes projected for the 2020-2949 (2030) period and A1B emission scenario. The baseline period was 1960-2000.

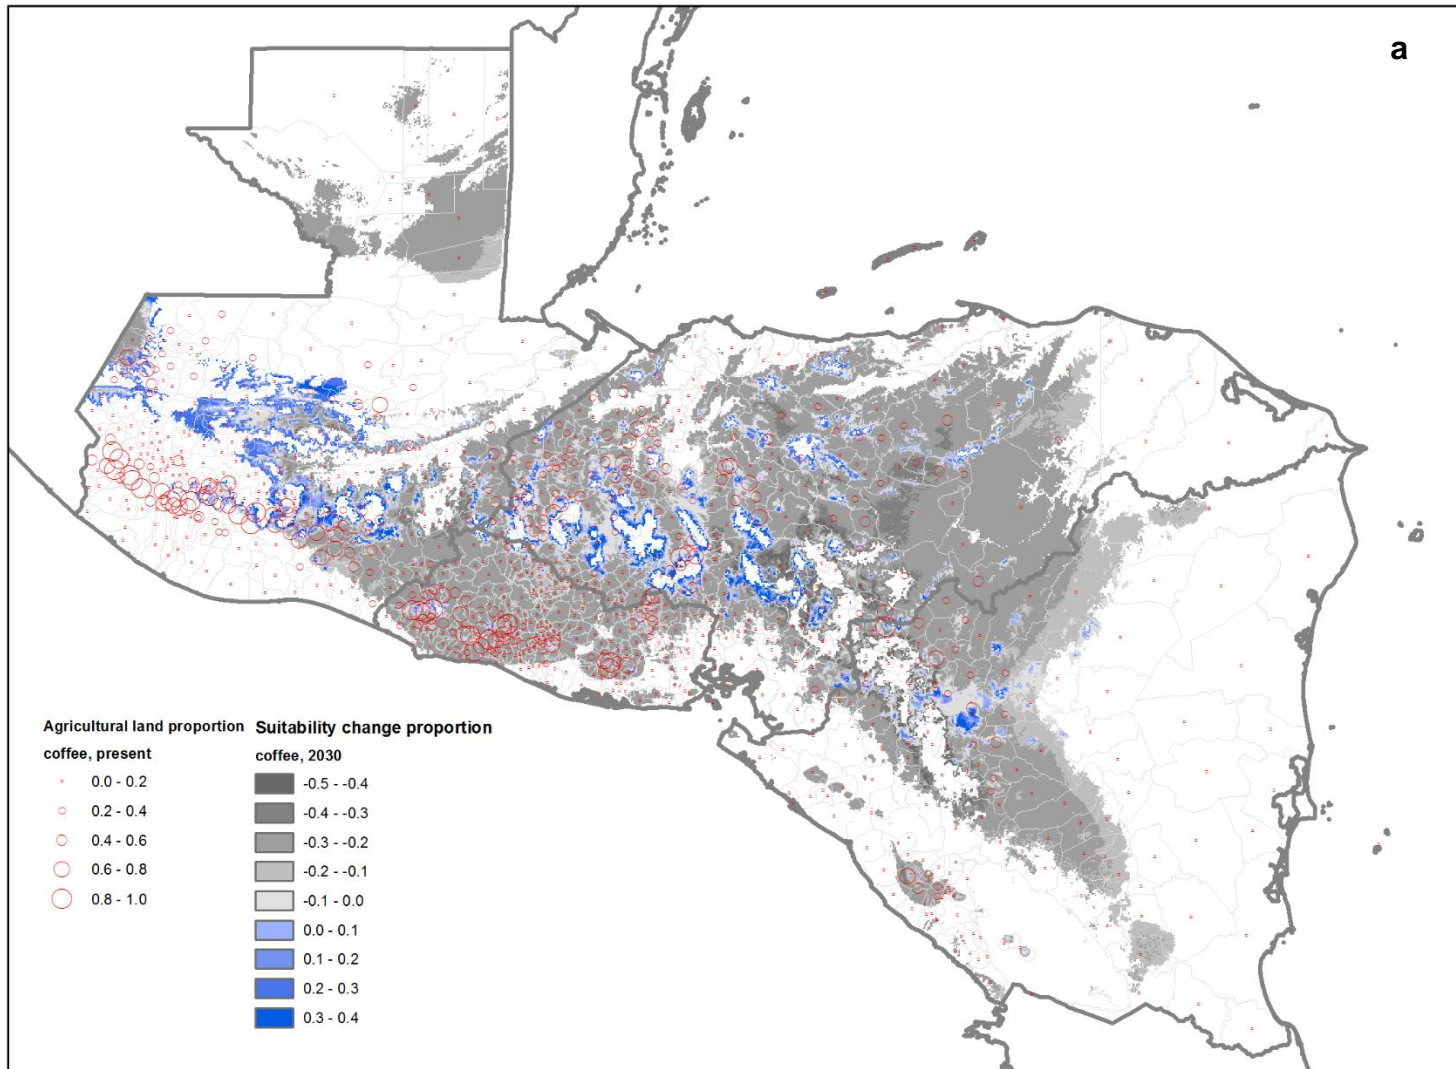

**b**

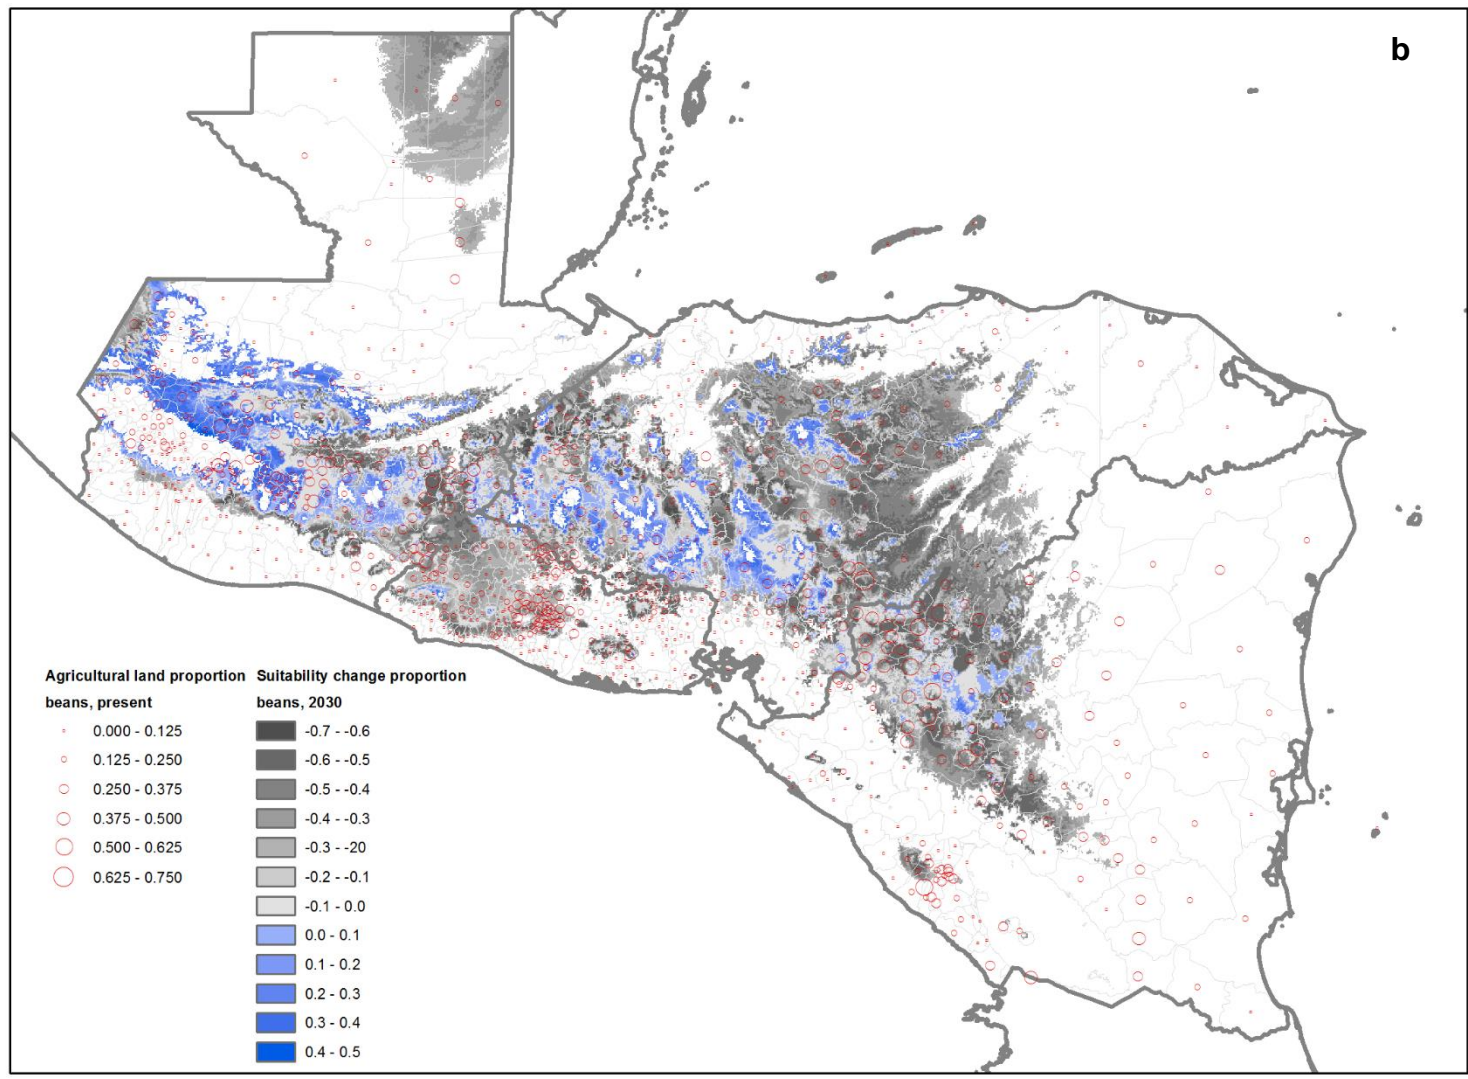

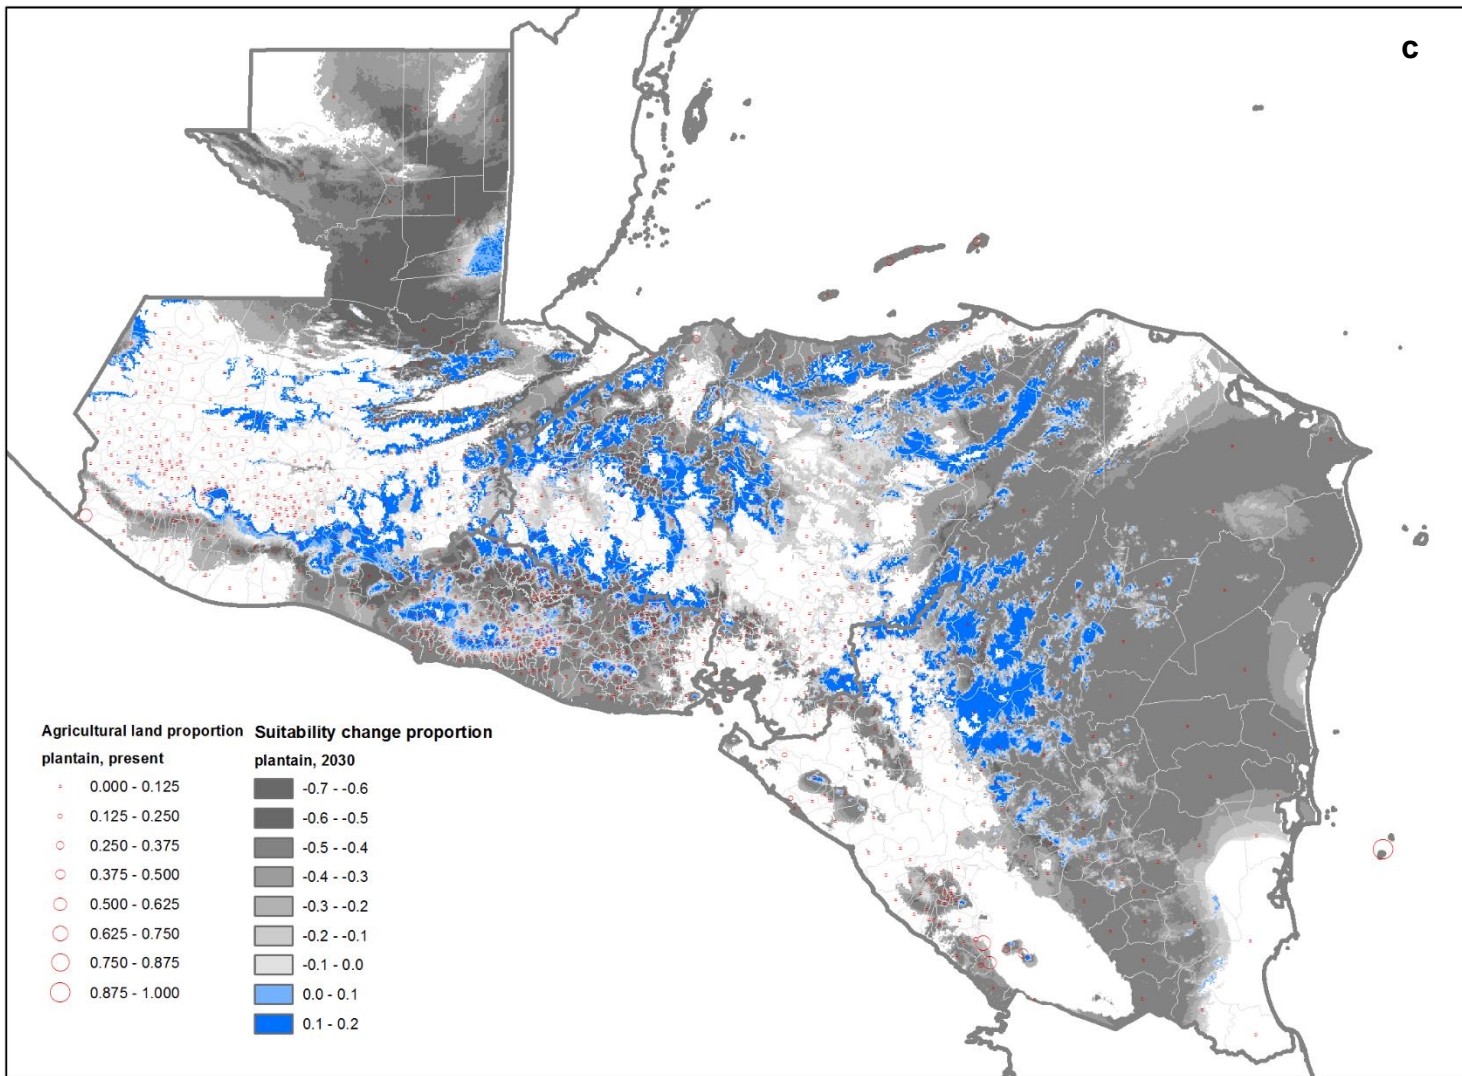



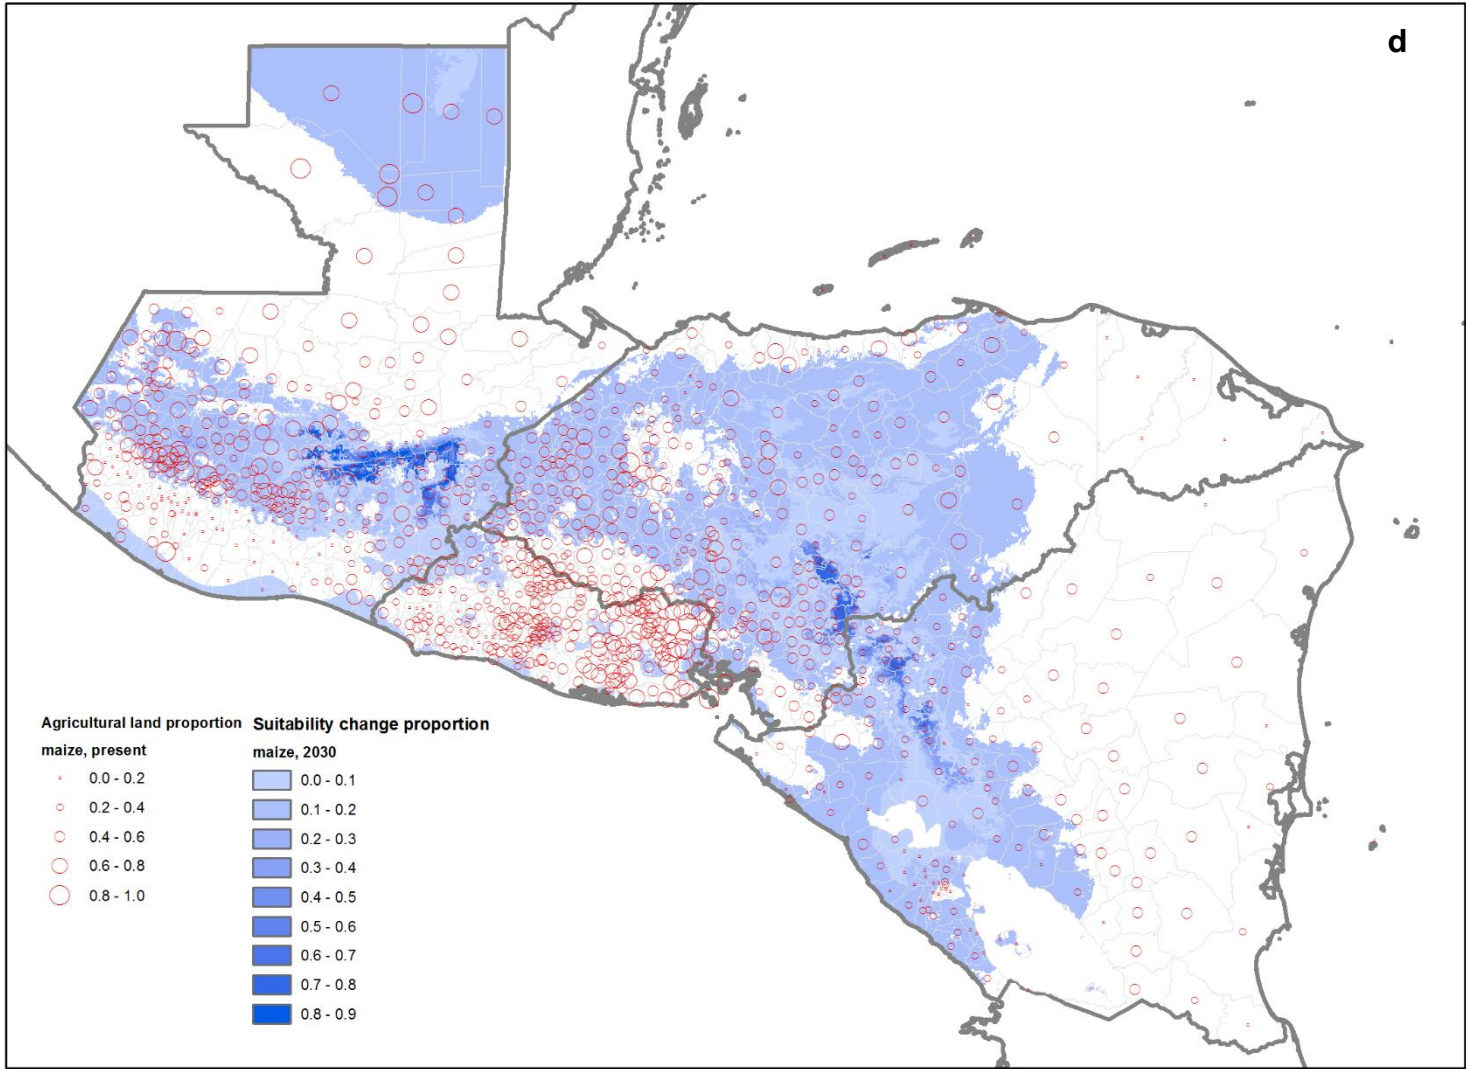

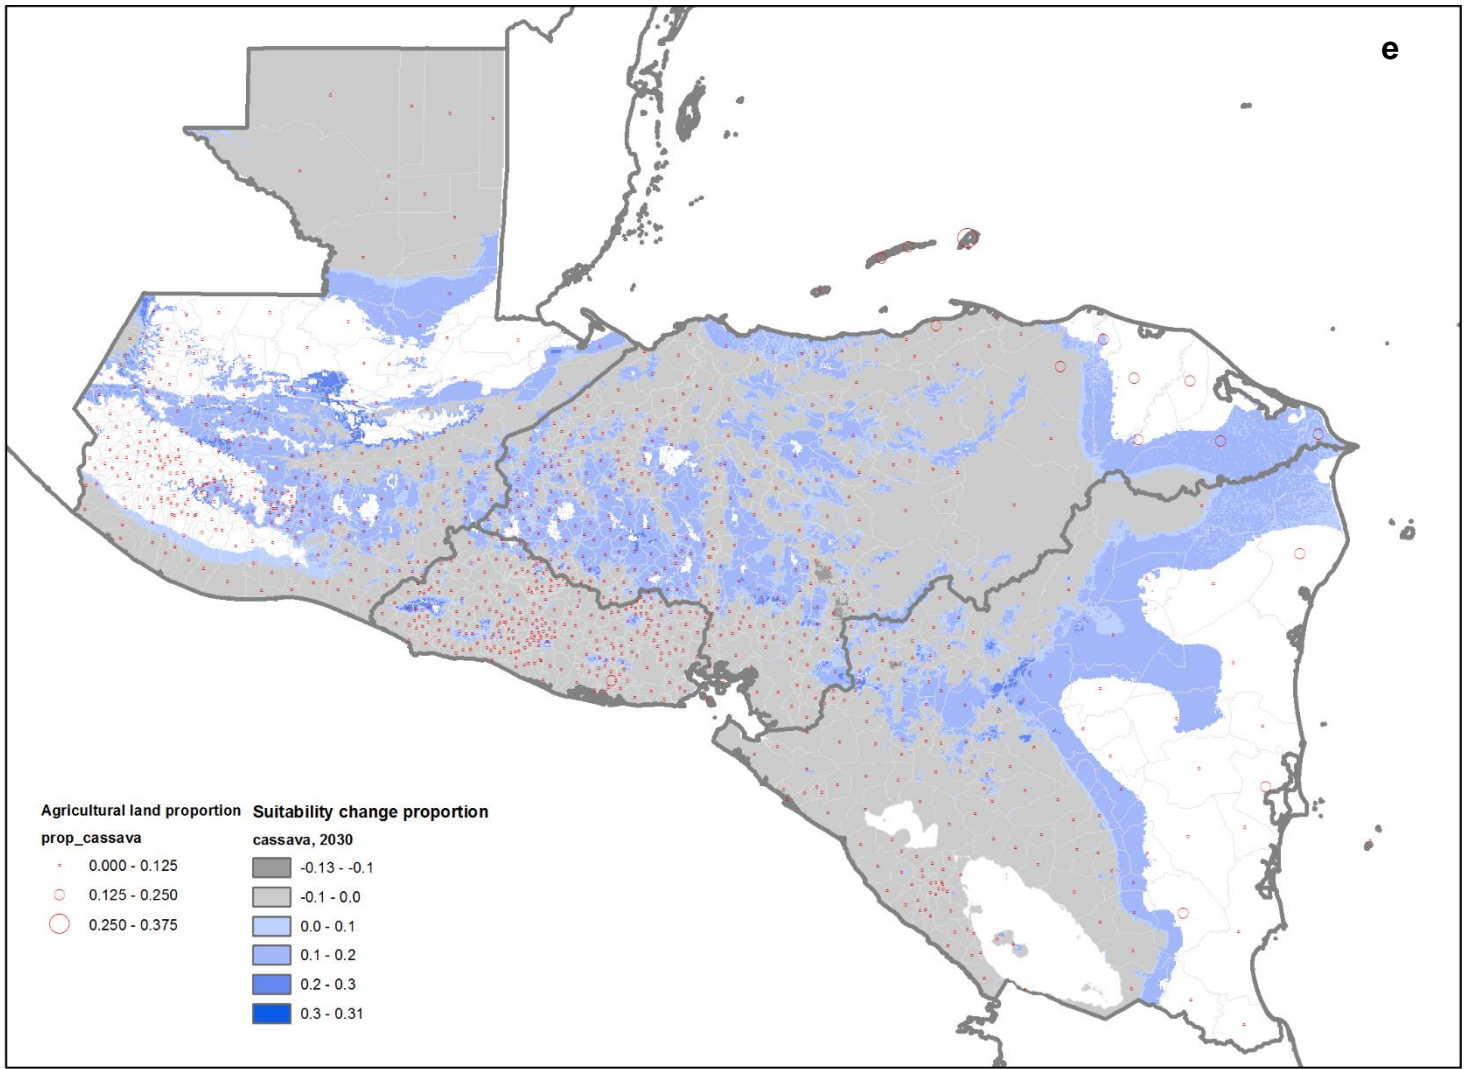

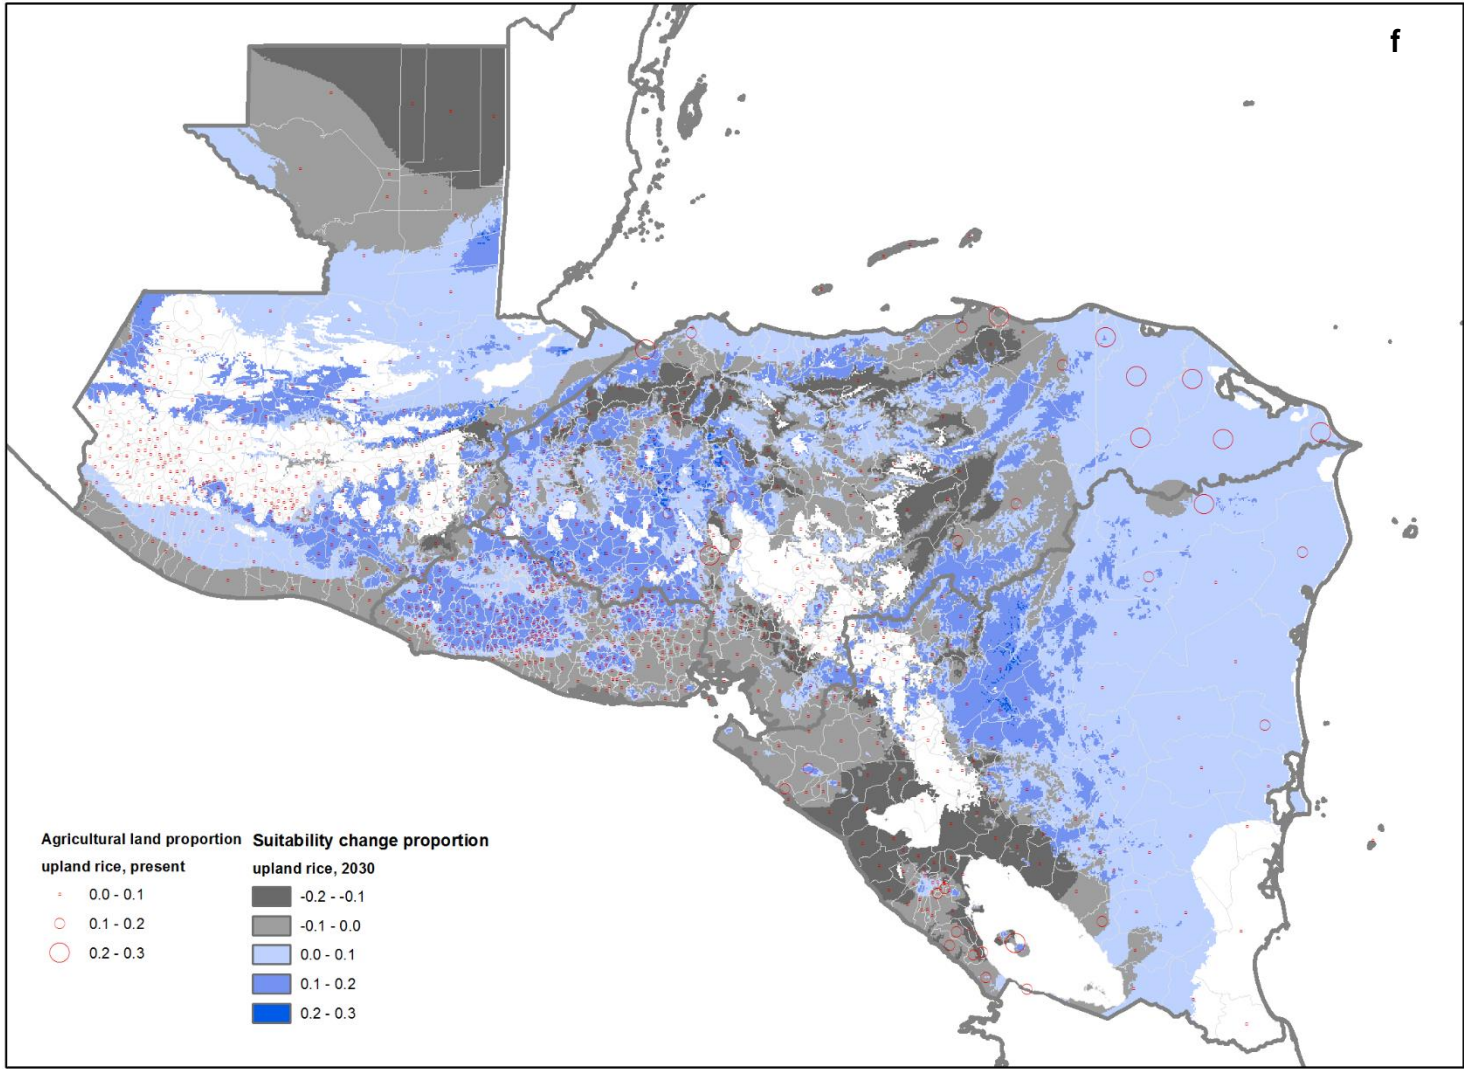



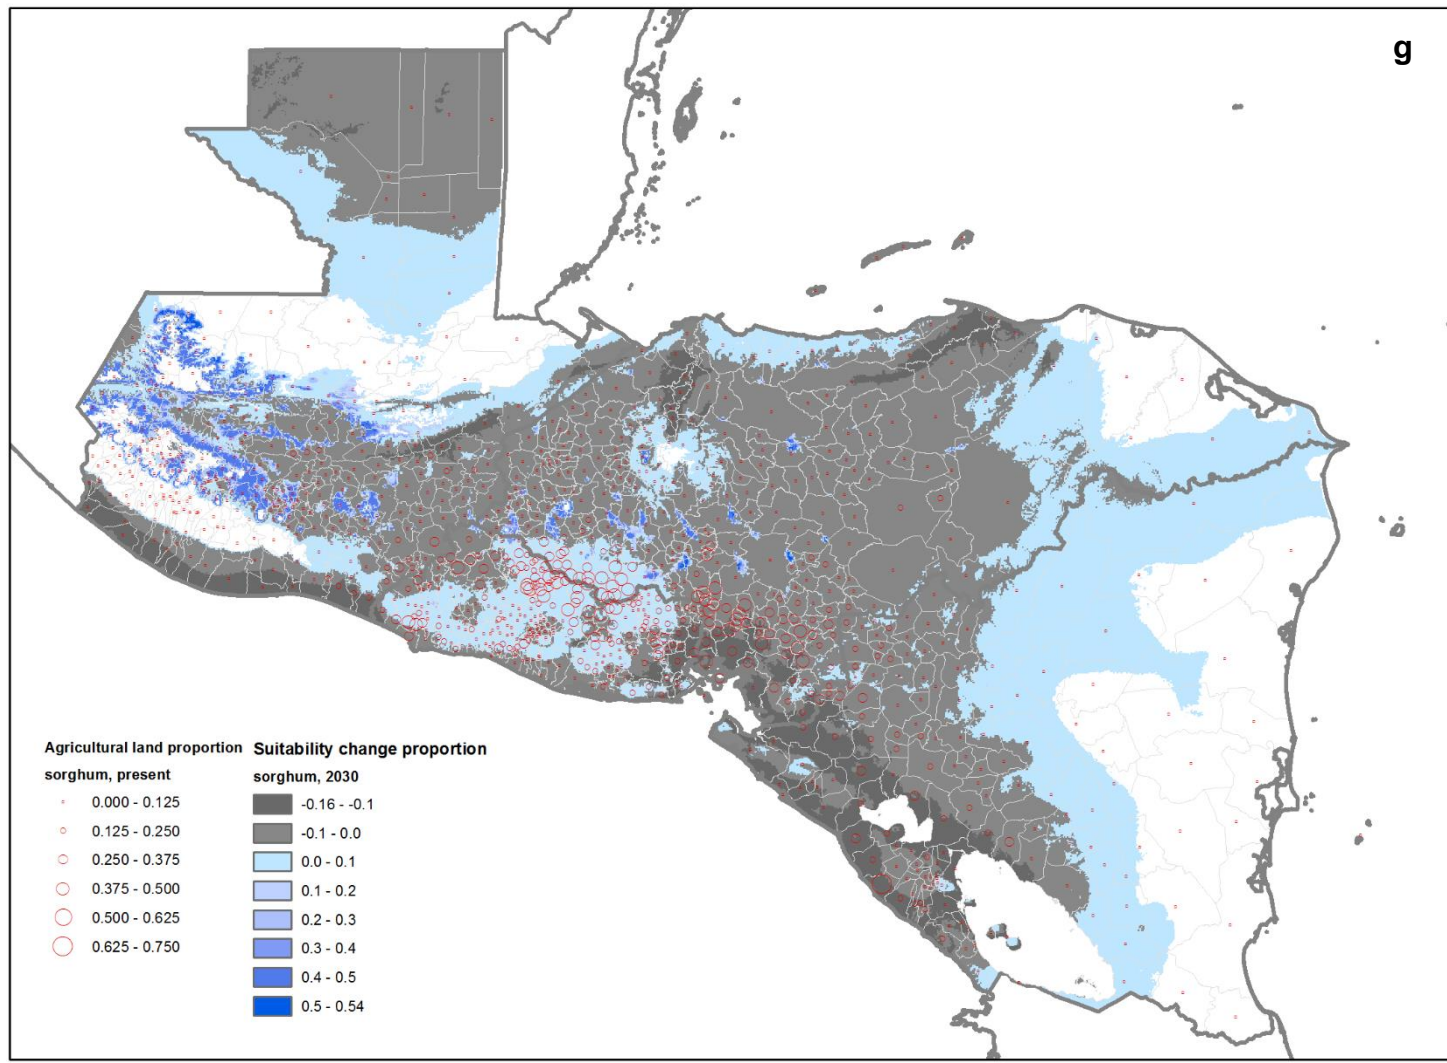

Supplement: 10584_2016_1792_MOESM7_ESM.pdf [file 10584_2016_1792_MOESM7_ESM.pdf]
