# Supplementary material for: Mapping climate change adaptive capacity and vulnerability of smallholder agricultural livelihoods in Central America: ranking and descriptive approaches to support adaptation strategies
Source: Springer Nature journal article supplement (doi:10.1007/s10584-016-1792-0), 2016-09-28
Supplement: 10584_2016_1792_MOESM9_ESM.pdf [file 10584_2016_1792_MOESM9_ESM.pdf]

Title: Mapping climate change adaptive capacity and vulnerability of smallholder agricultural livelihoods in Central America: ranking and descriptive approaches to support adaptation strategies

Journal: Climatic Change

Authors:

Claudia Bouroncle<sup>1\*</sup>, Pablo Imbach<sup>1</sup>, Beatriz Rodríguez-Sánchez<sup>2</sup>, Claudia Medellín<sup>1</sup>, Armando Martínez-Valle<sup>2</sup>, Peter Läderach<sup>2</sup>

Affiliations:

1. Climate Change Program, Tropical Agricultural Research and Higher Education Centre (CATIE), Turrialba, Costa Rica
2. Decision and Policy Analysis Research Area (DAPA), International Centre for Tropical Agriculture (CIAT), Cali, Colombia

\* Corresponding author e-mail: [cbouron@catie.ac.cr](mailto:cbouron@catie.ac.cr)

**Supplementary Material 9.** Eigenvector values of adaptive capacity indicators on the first component of the principal component analysis (PCA) in Guatemala, El Salvador, Honduras and Nicaragua.

| Indicator                                                             | Guatemala | El Salvador | Honduras | Nicaragua |
|-----------------------------------------------------------------------|-----------|-------------|----------|-----------|
| Rural households with access to safe drinking water                   | 0.25      | 0.13        | 0.34     | 0.37      |
| Primary healthcare units per 1000 people                              | 0.19      | -0.05       | -0.06    | -0.04     |
| Rural school-aged population attending school                         | 0.36      | 0.40        | 0.30     | 0.37      |
| Rural dwellings built with long-lasting materials                     | 0.38      | 0.44        | 0.44     | 0.34      |
| Rural gender parity index                                             | 0.39      | 0.39        | 0.36     | 0.36      |
| Entitled agricultural production units                                | -0.31     | 0.09        | 0.16     | -0.35     |
| Agricultural production units that receive technical assistance       | 0.08      | -0.10       | < 0.01   | 0.10      |
| Roads density                                                         | 0.30      | 0.34        | 0.15     | 0.33      |
| Rural economically active population with non-agricultural employment | 0.34      | 0.41        | 0.45     | 0.31      |
| Agricultural production units that receive a loan                     | 0.09      | 0.03        | -0.11    | -0.04     |
| Rural demographic dependency ratio                                    | 0.39      | 0.41        | 0.45     | 0.37      |
